# Supplementary material
Source: PubMed Central journal article supplement (PMC2683911)
Supplement: NIHMS104104-supplement-supplementary.pdf [file NIHMS104104-supplement-supplementary.pdf]

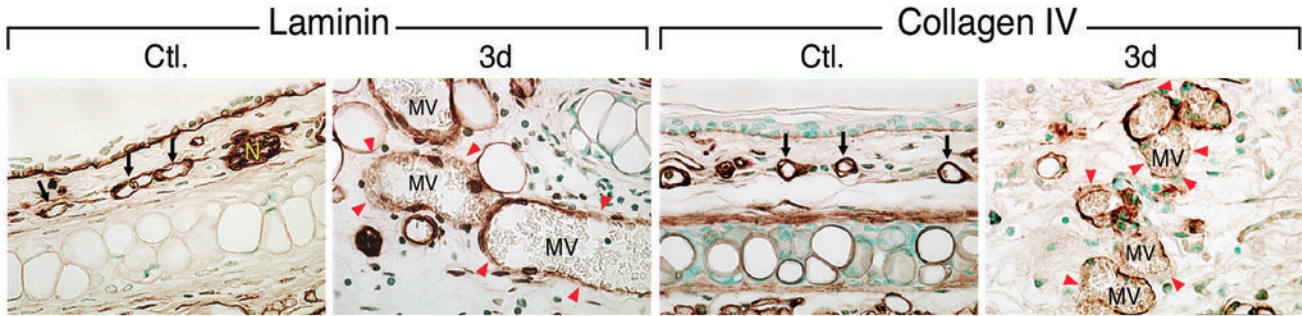

Chang et al. Supplementary Fig.1

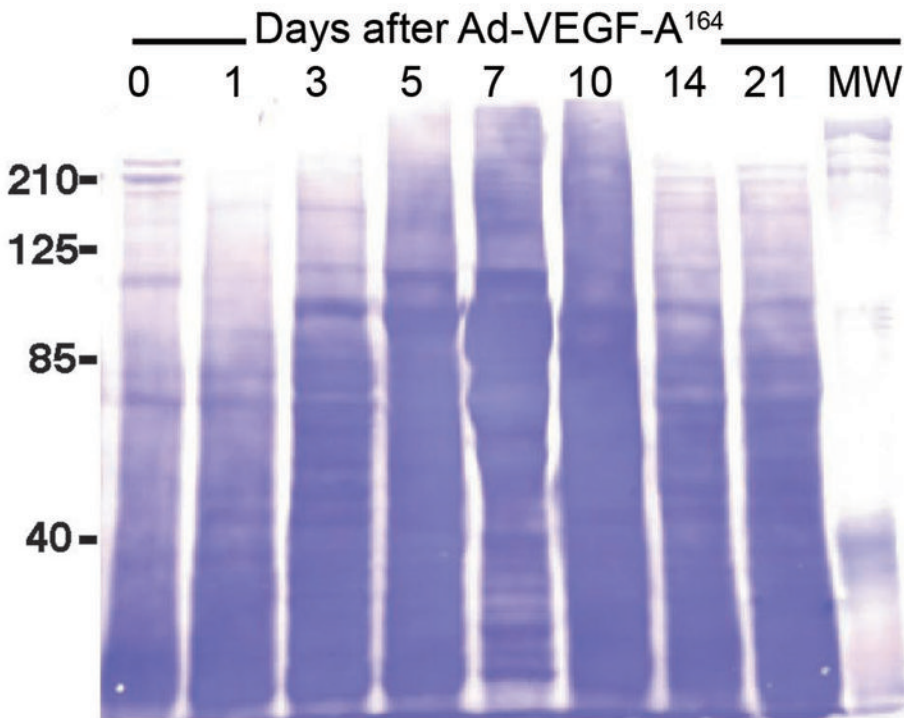

Chang et al. Supplementary Fig. 2

**A**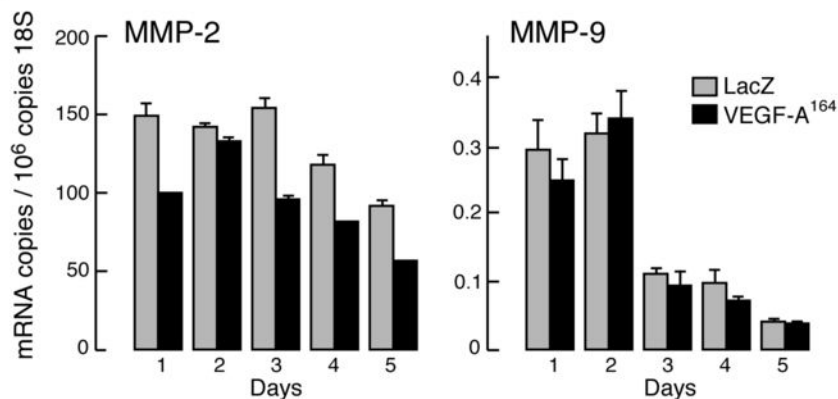**B**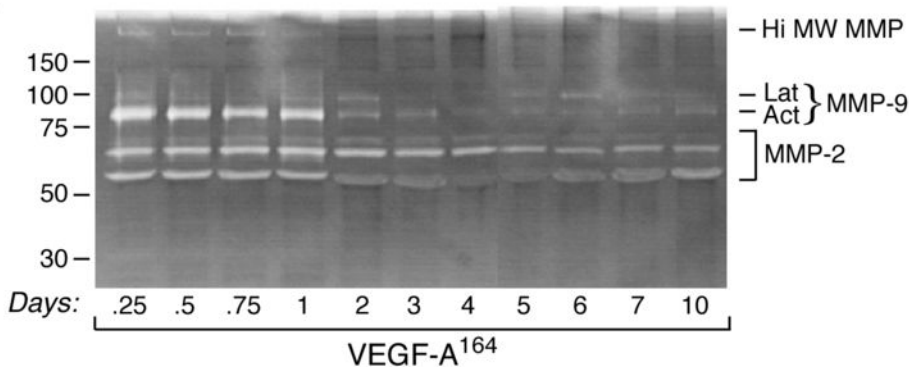**C**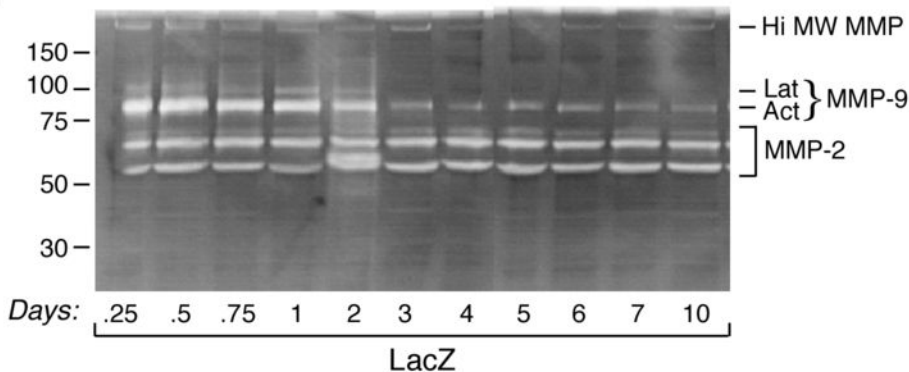

**Supplementary Figure 1.** Immunohistochemistry of sections of normal ears and ears injected 3 days earlier with Ad-VEGF-A<sup>164</sup>. Arrows in control ears indicate uniform laminin and collagen IV staining in normal venules. MV in Ad-VEGF-A<sup>164</sup>-injected ears demonstrate extensive patchy loss of laminin and collagen IV staining (red arrowheads). N, nerve. Scale bar, 50nm.

**Supplementary Figure 2.** Coomassie blue stained membrane serves as a loading control for Figure 1C.

**Supplementary Figure 3. Expression of MMP-2 and MMP-9 mRNAs and activities during MV formation.**  
(A) Quantitative RT-PCR demonstrating expression patterns of MMP-2 and -9 mRNAs in ears extracted at indicated times after injection of Ad-VEGF-A<sup>164</sup> or Ad-LacZ. (B, C) MMP-2 and latent and active forms of MMP-9 enzyme activity in ear extracts at various times following injection of Ad-VEGF-A<sup>164</sup> (B) or Ad-LacZ (C) as demonstrated by zymography (18).
